# Supplementary material
Source: PubMed Central journal article supplement (PMC5856626)
Supplement: NIHMS935625-supplement-1.pdf [file NIHMS935625-supplement-1.pdf]

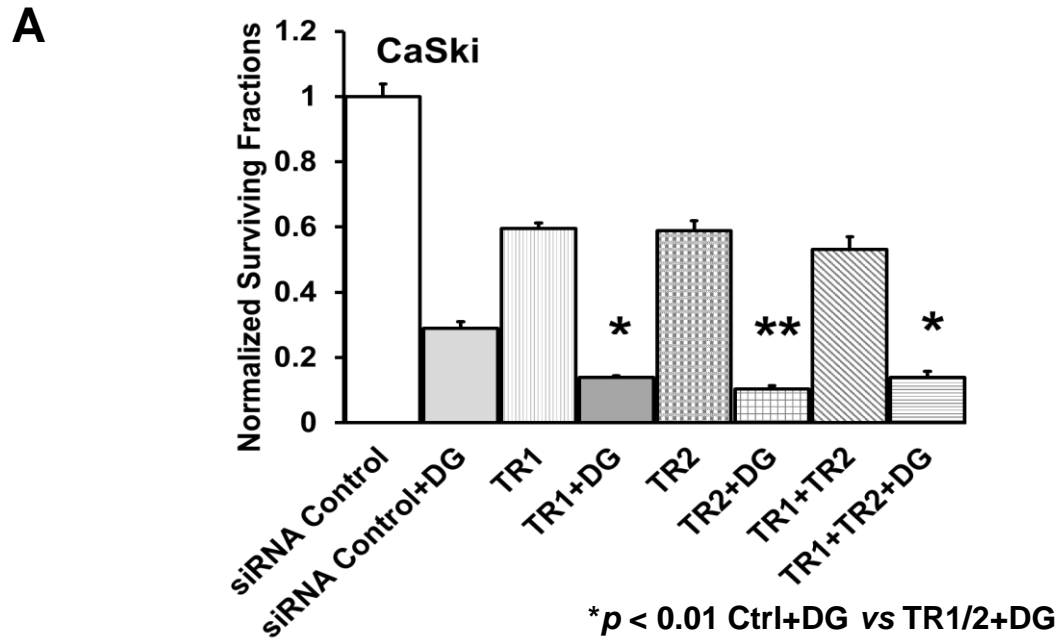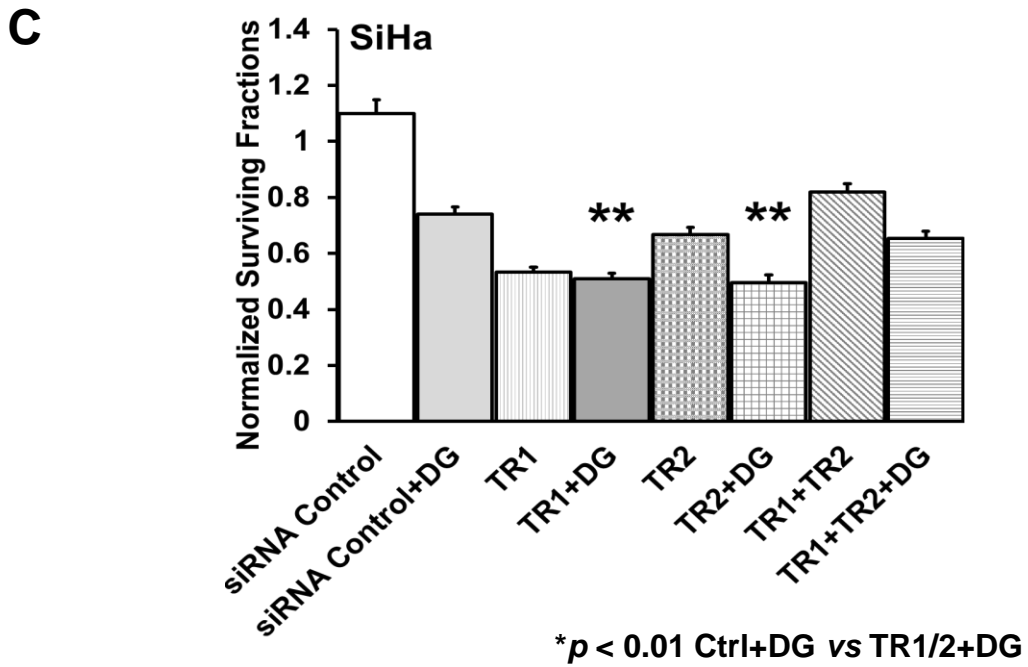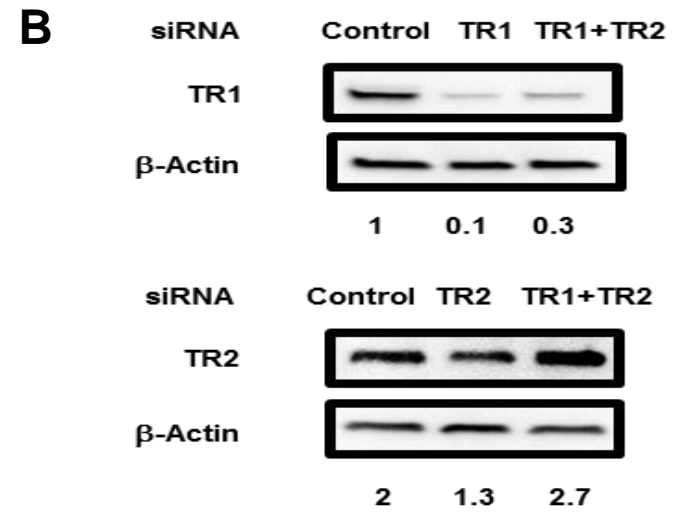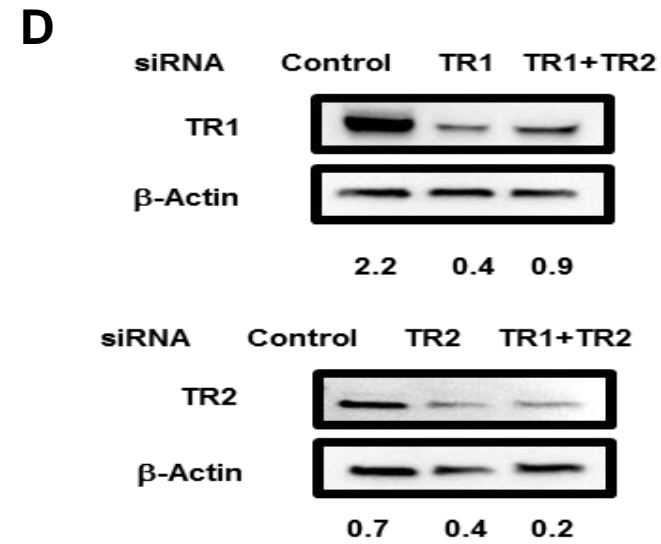

## Supplementary Figures

### Supplementary Figure 1. Effects of TR1 and TR2 knock down on 2-DG treated

**CaSki cells.** (A & C) CaSki and SiHa cells were transfected with control and TR1, TR2

and TR1+TR2 siRNA and after 24h, treated with 20mM 2-DG, 48h and CFA was

performed. \* $p < 0.01$  Control + DG vs TR1/TR2+DG, \* $p < 0.01$  Control vs TR1/2 siRNA. (B

& D) CaSki and SiHa cells were transfected with scrambled and TR1 and TR2 siRNA

and protein levels were determined by Western blot.
