# Supplementary material
Source: PubMed Central journal article supplement (PMC5856626)
Supplement: NIHMS935625-supplement-2.pdf [file NIHMS935625-supplement-2.pdf]

**A**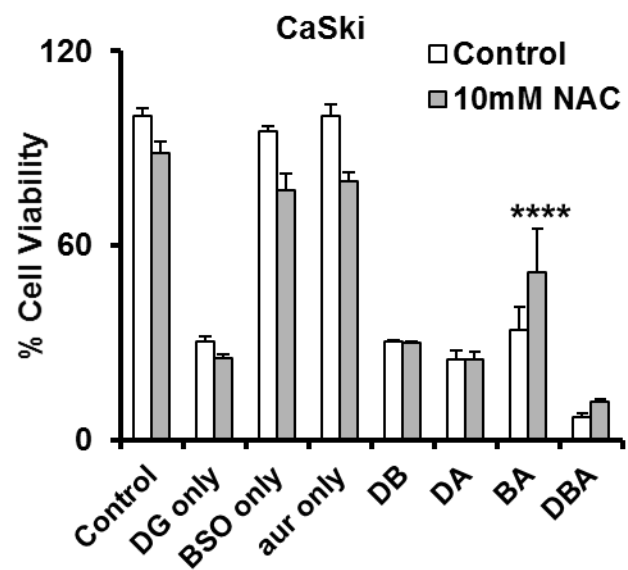**B**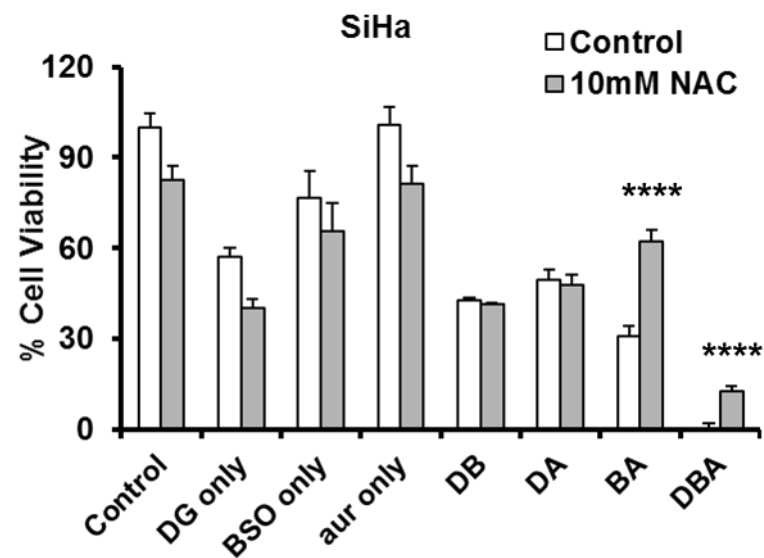

**Supplementary Figure 2. Role of anti-oxidant NAC on 2-DG, BSO and AUR**

**induced cell viability.** (A-B) Cells were seeded and treated with 2-DG and BSO for 24h followed by 5hrs of 10mM NAC with replacement of 2-DG, BSO and AUR for another 24h. Cell viability was determined by Alamar blue. *Statistical Analysis:* (A) BA vs NAC+BA,  $p<0.05$ ,  $N=3$  (B) BA vs NAC+BA and DBA vs NAC+DBA,  $p<0.05$ ,  $N=3$ .
