# Supplementary material
Source: PubMed Central journal article supplement (PMC5856626)
Supplement: NIHMS935625-supplement-3.pdf [file NIHMS935625-supplement-3.pdf]

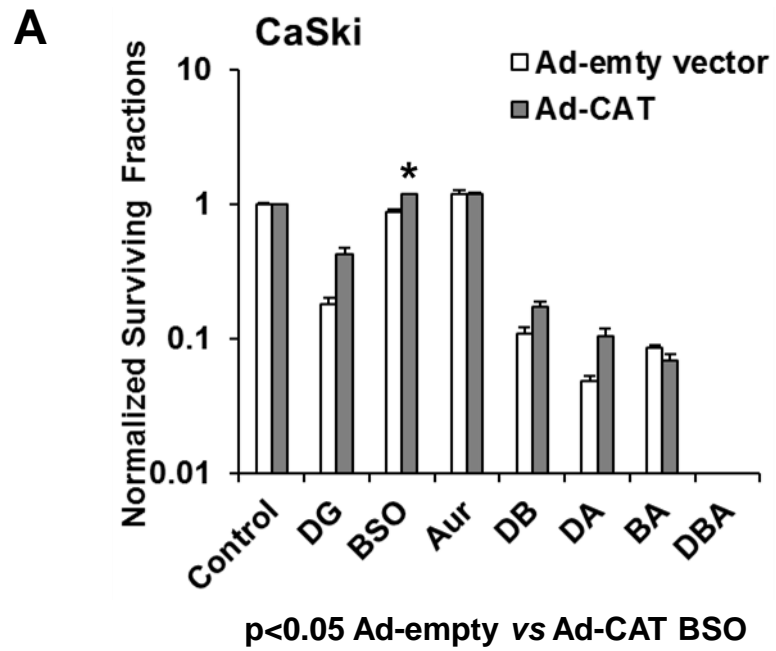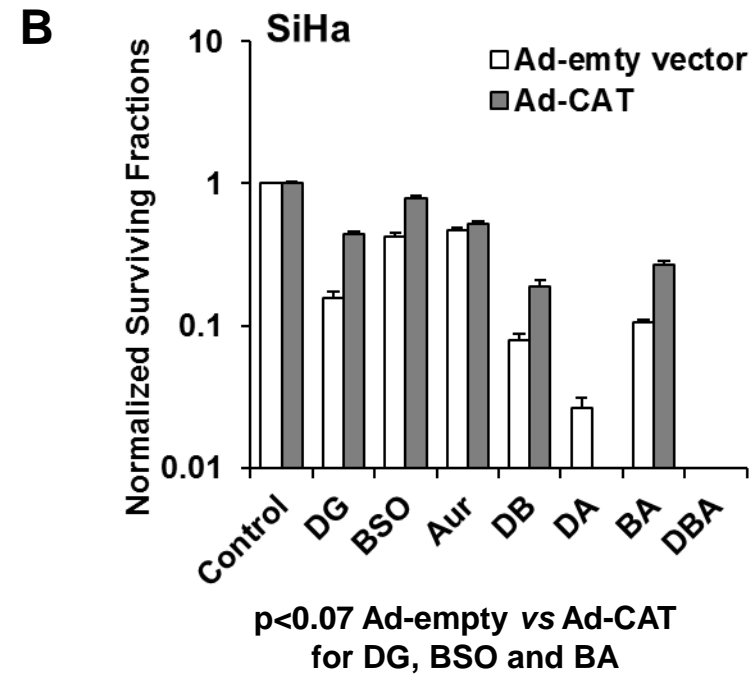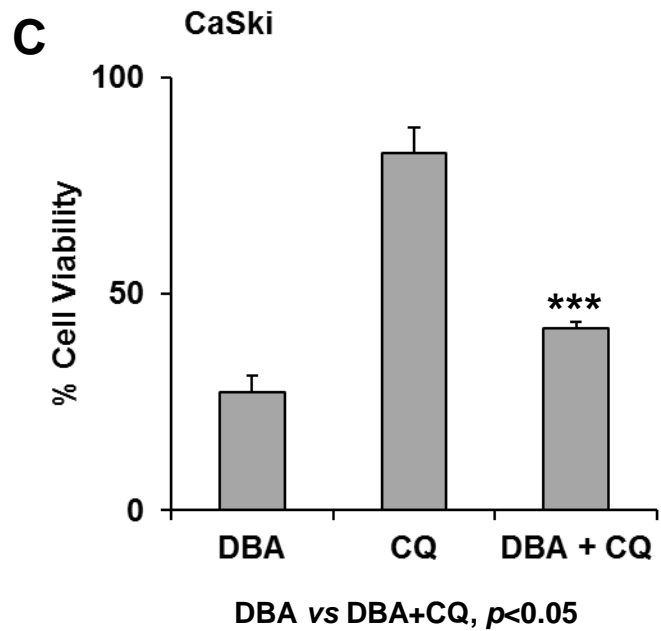

**Supplementary Figure 3. Effect of catalase over expression in the clonogenic survival of 2-DG, BSO and AUR treated cells.** (A-B) Cells were seeded and transduced with Ad CAT and Ad empty viruses and CFA was done as described in the materials and methods section. (C) CaSki cells were treated with 20mM 2-DG, 1mM BSO and 100nM AUR for 24h along with or without CQ (60 $\mu$ M) and cell viability was determined by Alamar Blue. Statistical Analysis: (A) \* $p < 0.05$  Ad-empty vs Ad-CAT BSO (B)  $p < 0.07$  Ad-empty vs Ad-CAT for DG, BSO and BA. (C) \*\*\*DBA vs DBA+CQ,  $p < 0.05$ ,  $N=3$ .
